# Supplementary material for: Novel crosslinked recombinant human collagen scaffolds with excellent cytocompatibility and wound healing effect
Source: Royal Society of Chemistry journal article supplement (doi:10.1039/d5ra04354a), 2025-01-01
Supplement: d5ra04354a2.pdf [file d5ra04354a2.pdf]

**Supplementary material 2: Evaluation of immunogenicity and *in vivo* degradation of rCOL scaffold material.**

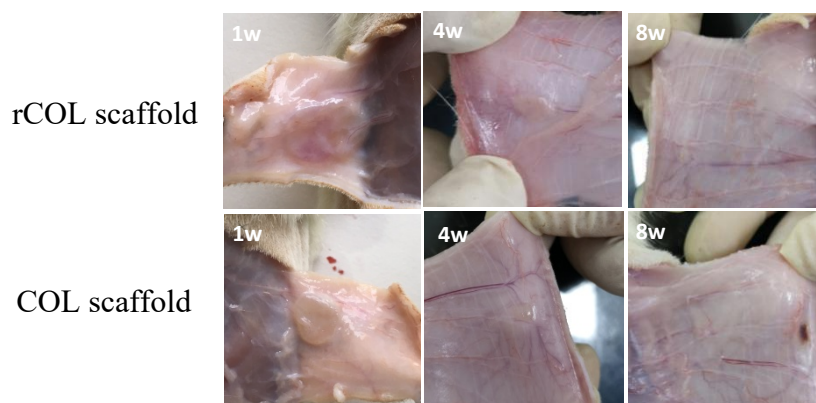

**Figure S1.** Degradation of node materials at different implantation time. After 4 weeks, the rCOL scaffold and the COL scaffold were degraded obviously, and the COL scaffold residue was less than that of the rCOL scaffold; The two groups of materials were completely degraded at 8 weeks. COL, commercially available animal-derived collagen; rCOL, recombinant human collagen.

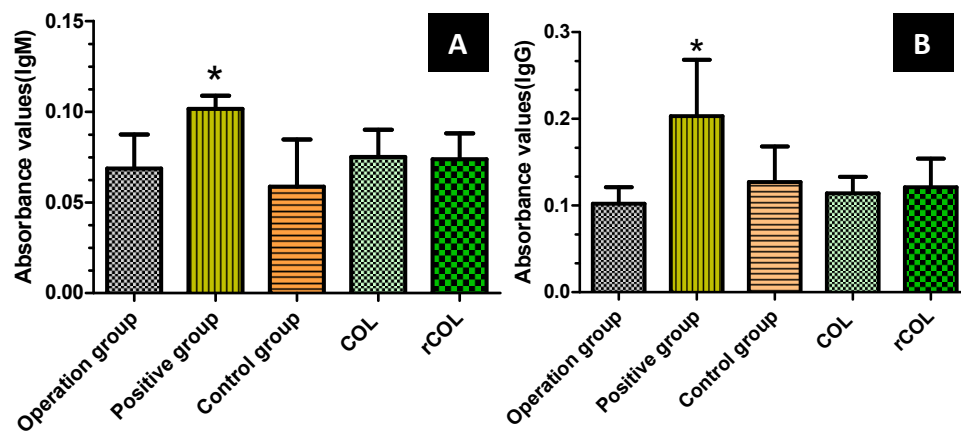

**Figure S2.** Immunoglobulin IgM and IgG content in 1 month post-implantation.

(A)The expression of IgM in serum; (B) the expression of IgG in serum; “\*” compared with the control group,  $p < 0.05$ . COL, commercially available animal-derived collagen scaffold; rCOL, recombinant human collagen scaffold.

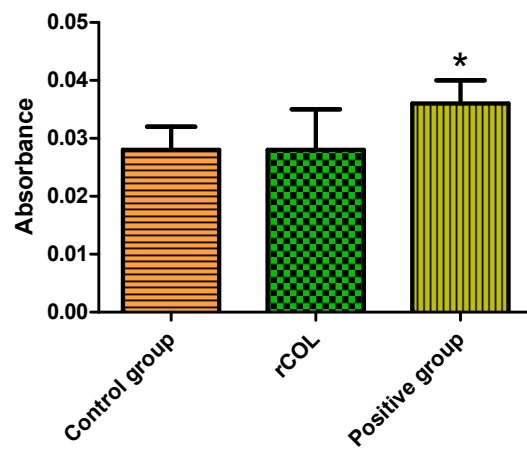

**Figure S3.** Results of T lymphocyte proliferation assay of rCOL scaffold *in vitro*. “\*” compared with the control group,  $p < 0.05$ . rCOL, recombinant human collagen scaffold.
